# Supplementary material for: Flanking-donor-controlled diversity in mechanical-force-induced reversible fluorochromism and enhanced emission for carboxylic acid and ester linked solid-state emitters
Source: Royal Society of Chemistry journal article supplement (doi:10.1039/d2ce01378a), 2023-01-01
Supplement: d2ce01378a1.pdf [file d2ce01378a1.pdf]

*Supporting Informations*

For

**Flanking-donor controlled diversity in mechanical-force-induced reversible  
fluorochromism and enhanced emission for carboxylic acid and ester-  
linked solid-state emitters**

Madhuparna Chakraborty and Manab Chakravarty\*

Department of Chemistry, BITS-Pilani Hyderabad Campus, Jawahar Nagar, Shameerpet,  
Hyderabad-500078, Telangana (India)

Contents:

1. Thermogravimetric analysis (TGA) for all the compounds (**Figure-S1**).....S3
2. Absorbance and emission spectra of TAA and TAE in various solvents (**Figure-S2**)  
.....S3
3. Absorbance and emission spectra of DMAA and DMAE in various solvents (**Figure-S3**).....S4
4. Absorbance and emission values of all the compounds with various solvents (**Table-S1**)  
.....S4 - S5
5. Absorbance spectra of (a) TAA (b) TAE and (c) DMAE for AIE studies (**Figure-S4**).....S5
6. Absorbance and emission spectra of DMAA for AIE study (**Figure-S5**).....S5
7. FE-SEM images of TAE at (a)  $f_w = 80\%$  (Aggregated State) and (b)  $f_w = 90\%$  (decreased emission state) (**Figure-S6**).....S5
8. Solid state absorption spectra of (a) TAA (b) TAE (c) DMAA and (d) DMAE before and after grinding (**Figure-S7**).....S6
9. ORTEP diagram of all the compounds with 50% probability level (**Figure-S8**)  
.....S6
10. List of various intermolecular interactions ( $\text{\AA}$ ) of TAA/TAE (**Table-S2**).....  
S7

|                                                                                                                                                          |         |
|----------------------------------------------------------------------------------------------------------------------------------------------------------|---------|
| 11. The packing pattern of (a) TAA (b) TAE ( <i>a</i> -axis view) (Figure-S9) .....                                                                      | S7      |
| 12. List of various intermolecular interactions (Å) of DMAA/DMAE (Table-S3) .....                                                                        | S7 - S8 |
| 13. The plot of maximum emission wavelength changes with multiple grinding/Fuming process for TAA, DMAA and DMAE (Figure-S10) .....                      | S8      |
| 14. DSC analysis of all the compounds (Figure-S11) .....                                                                                                 | S8      |
| 15. Lifetime measurement pot for all copounds (Figure-S12) .....                                                                                         | S9      |
| 16. Lifetime parameters table (Table-S4) .....                                                                                                           | S9      |
| 17. Solid state photophysical parameters for all the compounds with absorption and emission wavelength (Table-S5) .....                                  | S9      |
| 18. Quantitative interactions of all the compounds (Table-S6) .....                                                                                      | S10     |
| 19. $d_{\text{norm}}$ Hirshfeld surfaces for TAA, TAE, DMAE and DMAA and their 2D finger plots of C...H, H...C and C...C interactions (Figure-S13) ..... | S11     |
| 20. Crystallographic parameters of all the compounds (Table-S7).....                                                                                     | S12     |
| 21. Application of DMAA as a rewritable optical recorder (Figure-S14).....                                                                               | S12     |
| 22. <sup>1</sup> H NMR spectra for TAA (Figure-S15).....                                                                                                 | S13     |
| 23. <sup>13</sup> C NMR spectra for TAA (Figure-S16).....                                                                                                | S13     |
| 24. <sup>1</sup> H NMR spectra for TAE (Figure-S17).....                                                                                                 | S14     |
| 25. <sup>13</sup> C NMR spectra for TAE (Figure-S18).....                                                                                                | S14     |
| 26. <sup>1</sup> H NMR spectra for DMAA (Figure-S19).....                                                                                                | S15     |
| 27. <sup>13</sup> C NMR spectra for DMAA (Figure-S20).....                                                                                               | S15     |
| 28. <sup>1</sup> H NMR spectra for DMAE (Figure-S21).....                                                                                                | S16     |
| 29. <sup>13</sup> C NMR spectra for DMAE (Figure-S22).....                                                                                               | S16     |

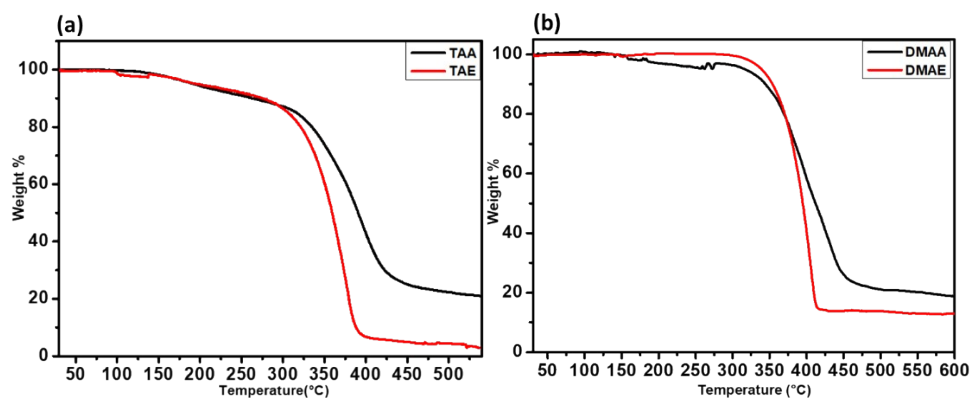

**Figure S1:** TGA thermogram for (a) TAA/ TAE and (b) DMAA/DMAE

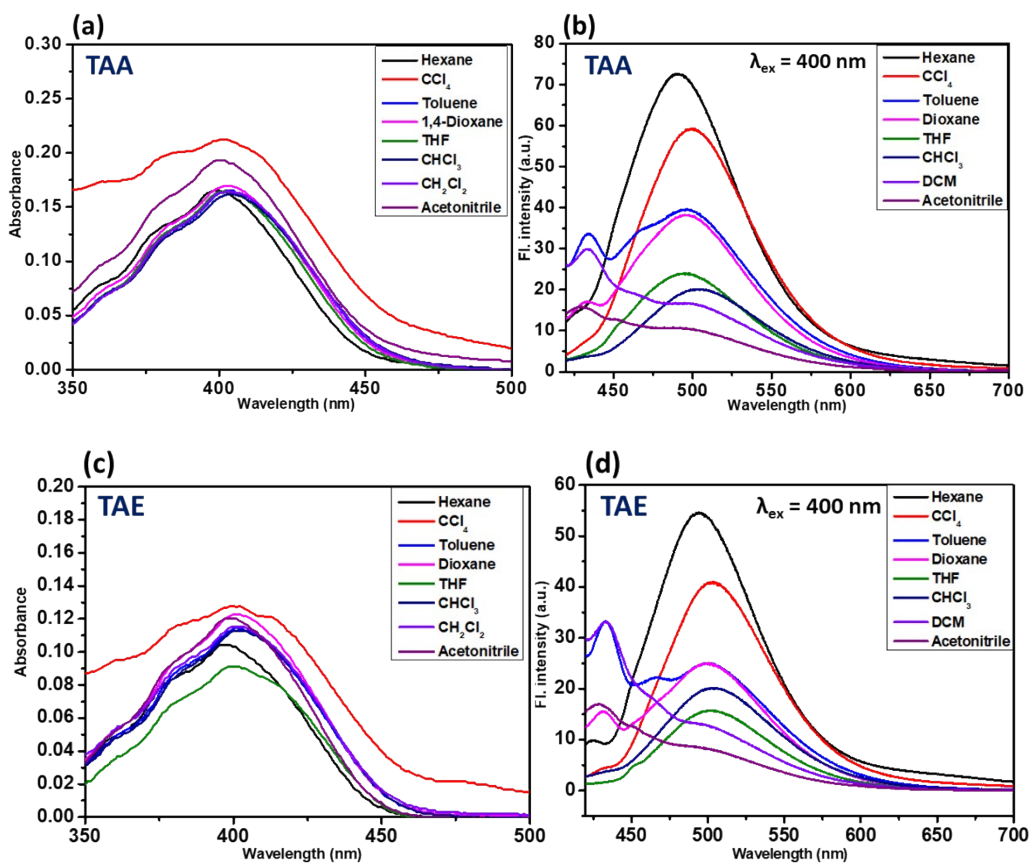

**Figure S2:** Absorbance and emission spectra of TAA/TAE in various solvents.

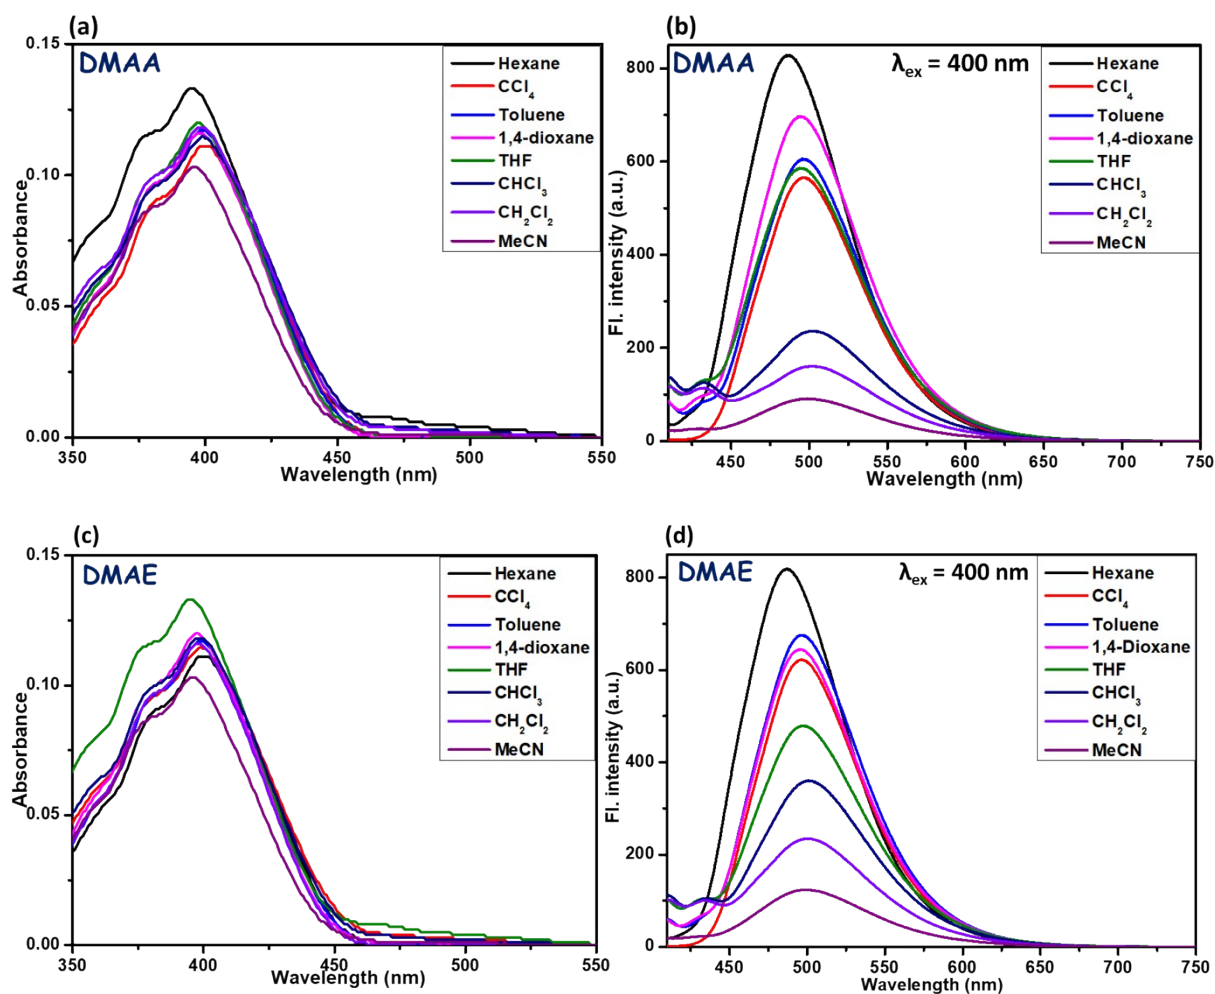

**Figure S3:** Absorbance and emission spectra of DMAA/DMAE in various solvents.

**Table S1:** Absorbance and emission values of all the compounds with various solvents

| Solvents         | $\lambda_{\text{abs.}} / \lambda_{\text{em}} \text{ (nm)}$ for TAA | $\lambda_{\text{abs.}} / \lambda_{\text{em}} \text{ (nm)}$ for TAE | $\lambda_{\text{abs.}} / \lambda_{\text{em}} \text{ (nm)}$ for DMAA | $\lambda_{\text{abs.}} / \lambda_{\text{em}} \text{ (nm)}$ for DMAE |
|------------------|--------------------------------------------------------------------|--------------------------------------------------------------------|---------------------------------------------------------------------|---------------------------------------------------------------------|
| Hexane           | 400/ 490                                                           | 396/ 494                                                           | 395/ 487.4                                                          | 395/ 486.6                                                          |
| CCl <sub>4</sub> | 403/ 499                                                           | 401/ 502                                                           | 400/ 496.2                                                          | 400/ 496.4                                                          |
| Toluene          | 404/ 433; 493                                                      | 401/ 433; 499                                                      | 399/ 497.2                                                          | 399/ 496.2                                                          |
| 1,4-Dioxane      | 403/ 432; 494                                                      | 401/ 431; 499                                                      | 398/ 495.4                                                          | 398/ 496.2                                                          |
| THF              | 403/ 495                                                           | 400/ 503                                                           | 398/ 495.2                                                          | 398/ 498.2                                                          |

|                                 |               |               |            |            |
|---------------------------------|---------------|---------------|------------|------------|
| CHCl <sub>3</sub>               | 404/ 503      | 401/ 503      | 399/ 502   | 399/ 501   |
| CH <sub>2</sub> Cl <sub>2</sub> | 400/ 435; 498 | 401/ 433; 494 | 399/ 502.4 | 399/ 500.4 |
| MeCN                            | 403/ 429; 491 | 398/ 429; 494 | 396/ 498.8 | 397/ 499.8 |

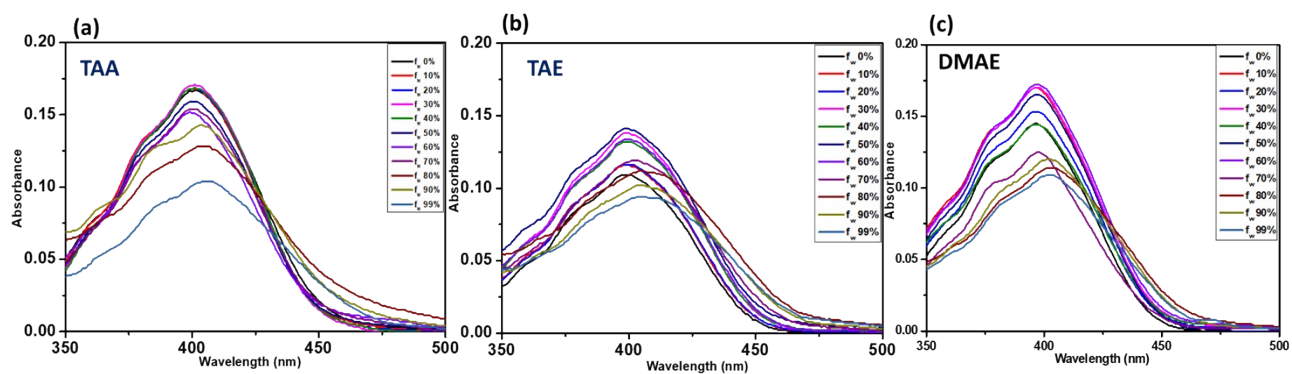

**Figure S4:** Absorption spectra of (a) TAA (b) TAE [ $\lambda_{ex} = 400$  nm] and (c) DMAE [ $\lambda_{ex} = 396$  nm] upon water addition with 10  $\mu$ M probe in acetonitrile.

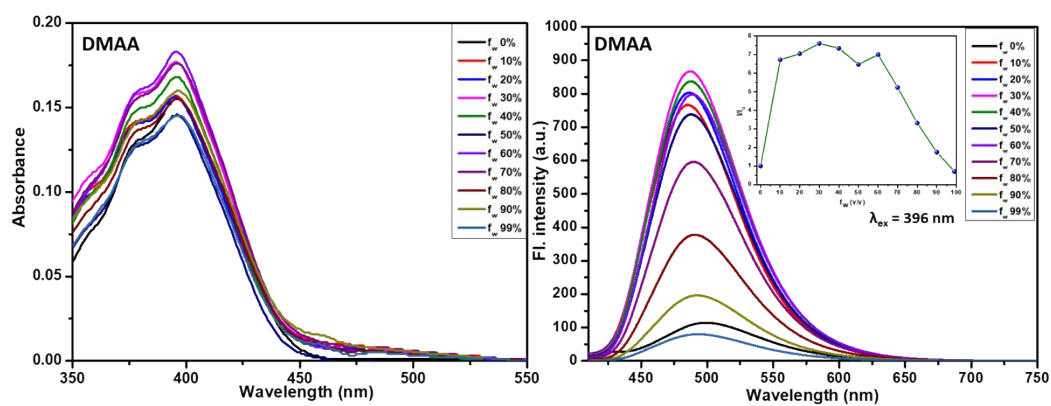

**Figure S5:** Absorption and Emission spectra of DMAA [ $\lambda_{ex} = 396$  nm] upon water addition with 10  $\mu$ M probe in acetonitrile.

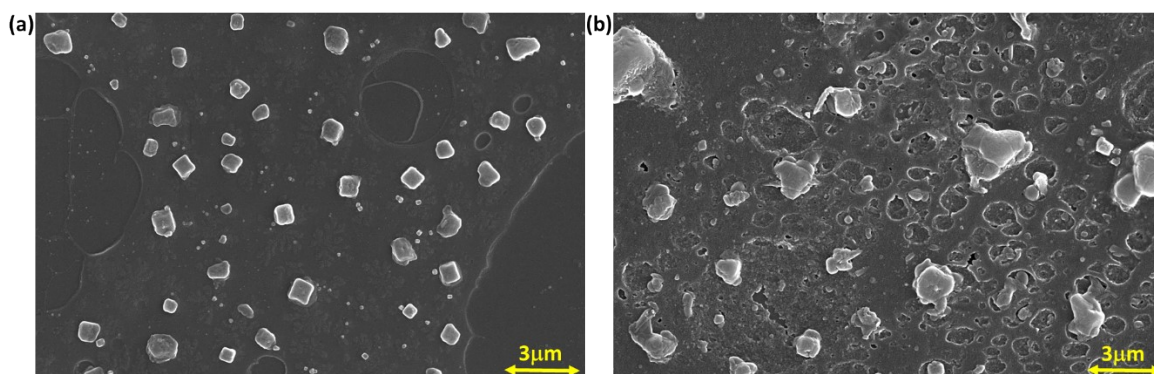

**Figure S6:** FE-SEM images of TAE at (a)  $f_w = 80\%$  (Aggregated State) and (b)  $f_w = 90\%$  (decreased emission state) [drop casted on silicon wafer].

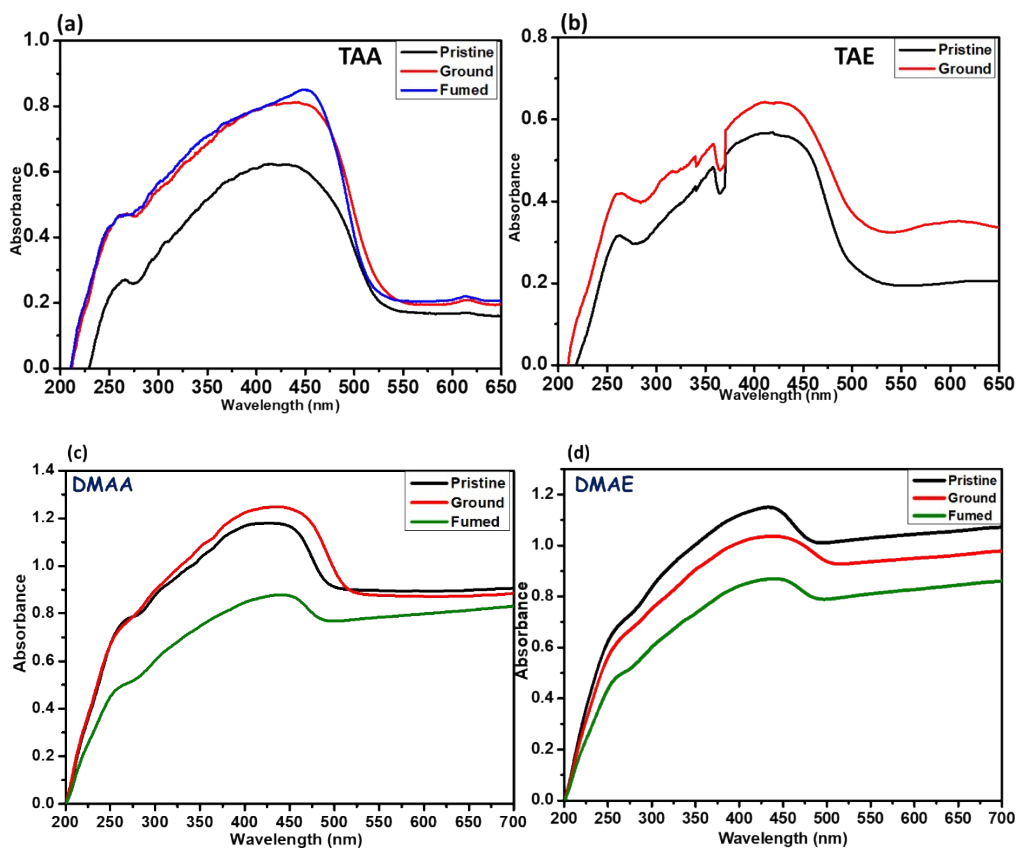

**Figure S7:** Solid-state absorption spectra of (a) TAA, (b) TAE, (c) DMAA and (d) DMAE before and after grinding

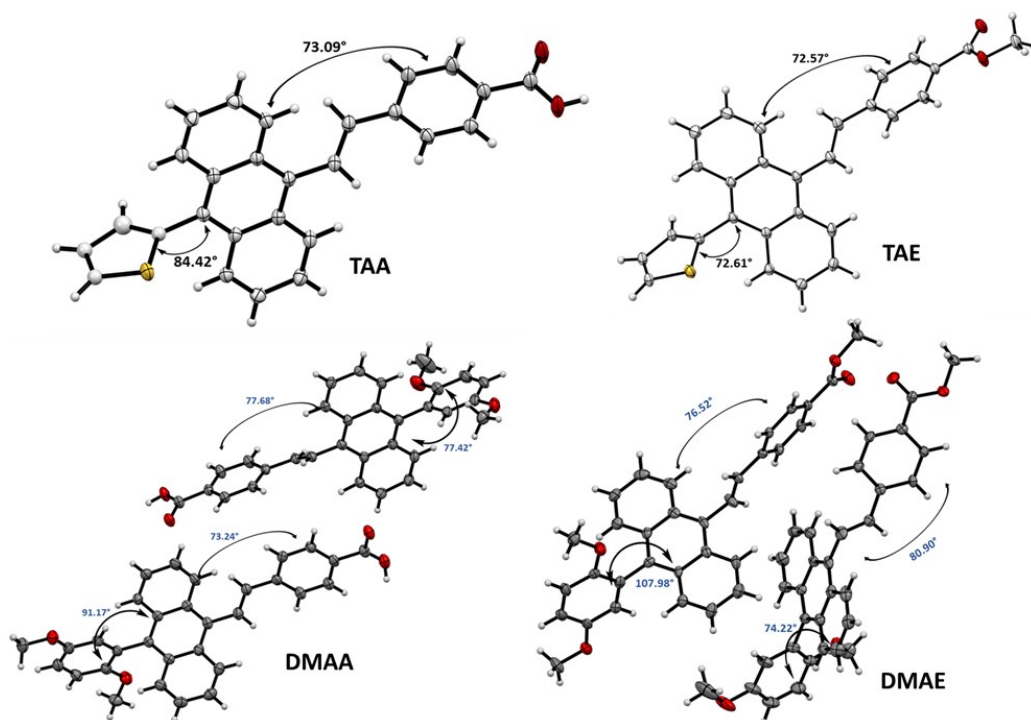

**Figure S8:** ORTEP diagram of TAA, TAE, DMAA and DMAE with 50% probability level

**Table S2:** List of various intermolecular interactions (Å) of TAA/TAE

| Compounds                                                  | C...H                                                                                                                              | H...H | O...H                              | O...O |
|------------------------------------------------------------|------------------------------------------------------------------------------------------------------------------------------------|-------|------------------------------------|-------|
| TAE<br>(9 interactions)<br>( 5 C-H... $\pi$ interactions ) | 2.872 (C-H... $\pi$ )<br>2.781 (C-H... $\pi$ )<br>2.869 (C-H... $\pi$ )<br>2.827<br>2.775 (C-H... $\pi$ )<br>2.897 (C-H... $\pi$ ) | 2.375 | 2.474 (C-H...O)<br>2.542 (C-H...O) |       |
| TAA<br>(8 interactions)<br>( 4 C-H... $\pi$ interactions ) | 2.859 (C-H... $\pi$ )<br>2.792 (C-H... $\pi$ )<br>2.625<br>2.880 (C-H... $\pi$ )<br>2.830 (C-H... $\pi$ )                          | 2.371 | 1.733 (O-H...O)                    | 2.614 |

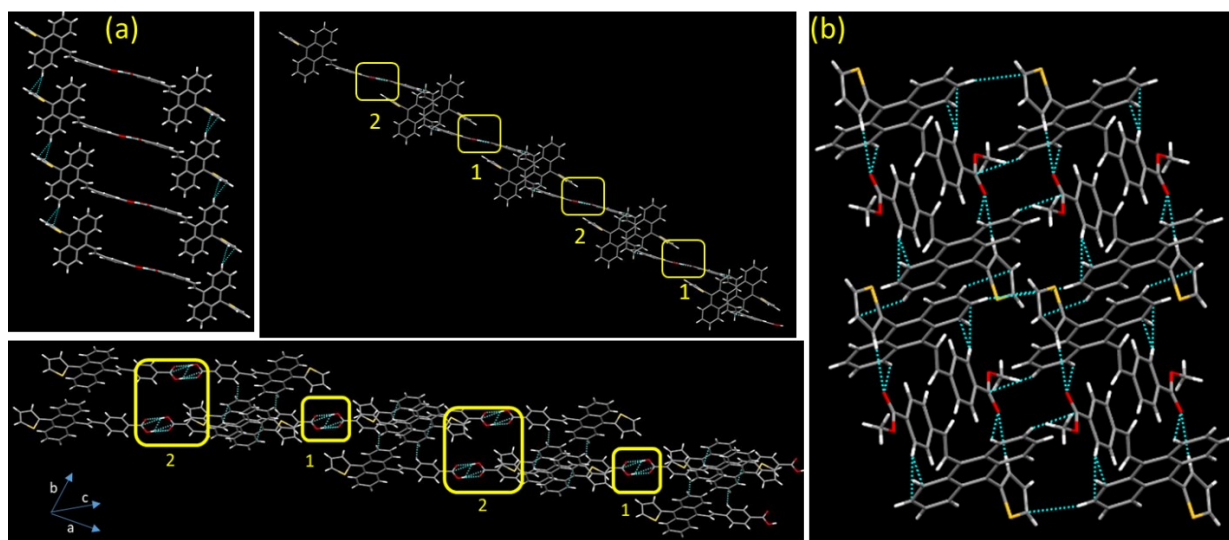

Figure S9: The packing pattern of (a) TAA (b) TAE (*a*-axis view)

Table S3: List of various intermolecular interactions ( $\text{\AA}$ ) of DMAA/DMAE

| Compounds                                                                                                            | C...H                                                                                                                                                                                                                                                                                                                                                  | C...C                                                                                     | C...O                            | H...H                          | O...H                                                                                            | O...O          |
|----------------------------------------------------------------------------------------------------------------------|--------------------------------------------------------------------------------------------------------------------------------------------------------------------------------------------------------------------------------------------------------------------------------------------------------------------------------------------------------|-------------------------------------------------------------------------------------------|----------------------------------|--------------------------------|--------------------------------------------------------------------------------------------------|----------------|
| <b>DMAE</b><br>(22 interactions)<br>( 7 C-H... $\pi$ interactions )<br><b>Eight interactions are from DMB (bold)</b> | 2.841 (C-H... $\pi$ )<br>2.892 (C-H... $\pi$ )<br><b>2.853 (C-H...<math>\pi</math>)</b><br><b>2.817 (C-H...<math>\pi</math>)</b><br>2.898 (C-H... $\pi$ )<br>2.802 (C-H... $\pi$ )<br>2.828 (C-H... $\pi$ )                                                                                                                                            | <b>3.349</b><br>(not $\pi$ ... $\pi$ )<br><b>3.390</b><br>(not $\pi$ ... $\pi$ )          | 3.201<br>3.178<br>3.204<br>3.211 | 2.354                          | <b>2.701</b><br><b>2.684</b><br>2.594<br>2.668<br>2.713<br><b>2.507</b><br>2.649<br><b>2.621</b> |                |
| <b>DMAA</b><br>(21 interactions)<br>( 9 C-H... $\pi$ interactions )<br><b>Nine interactions are from DMB (bold)</b>  | 2.894 (C-H... $\pi$ )<br><b>2.899 (C-H...<math>\pi</math>)</b><br><b>2.900 (C-H...<math>\pi</math>)</b><br>2.549<br><b>2.829 (C-H...<math>\pi</math>)</b><br><b>2.845 (C-H...<math>\pi</math>)</b><br><b>2.824 (C-H...<math>\pi</math>)</b><br><b>2.778 (C-H...<math>\pi</math>)</b><br><b>2.762 (C-H...<math>\pi</math>)</b><br>2.865 (C-H... $\pi$ ) | 3.326 ( $\pi$ ... $\pi$ )<br>3.373<br>(not $\pi$ ... $\pi$ )<br>3.342 ( $\pi$ ... $\pi$ ) |                                  | 2.163<br>2.373<br><b>2.342</b> | 1.769 (O-H...O)<br><b>2.456 (C-H...O)</b>                                                        | 2.590<br>2.618 |

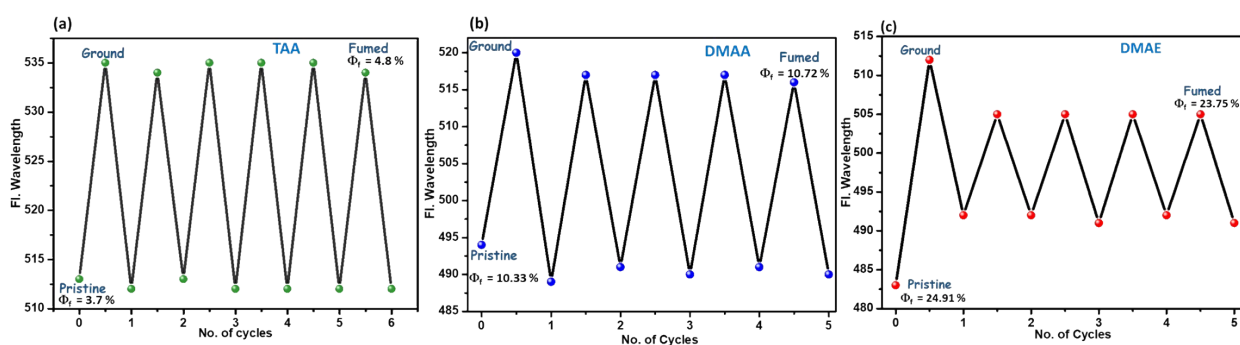



**Figure S10:** The plot of change in maximum emission wavelength with multiple grinding/fuming process.

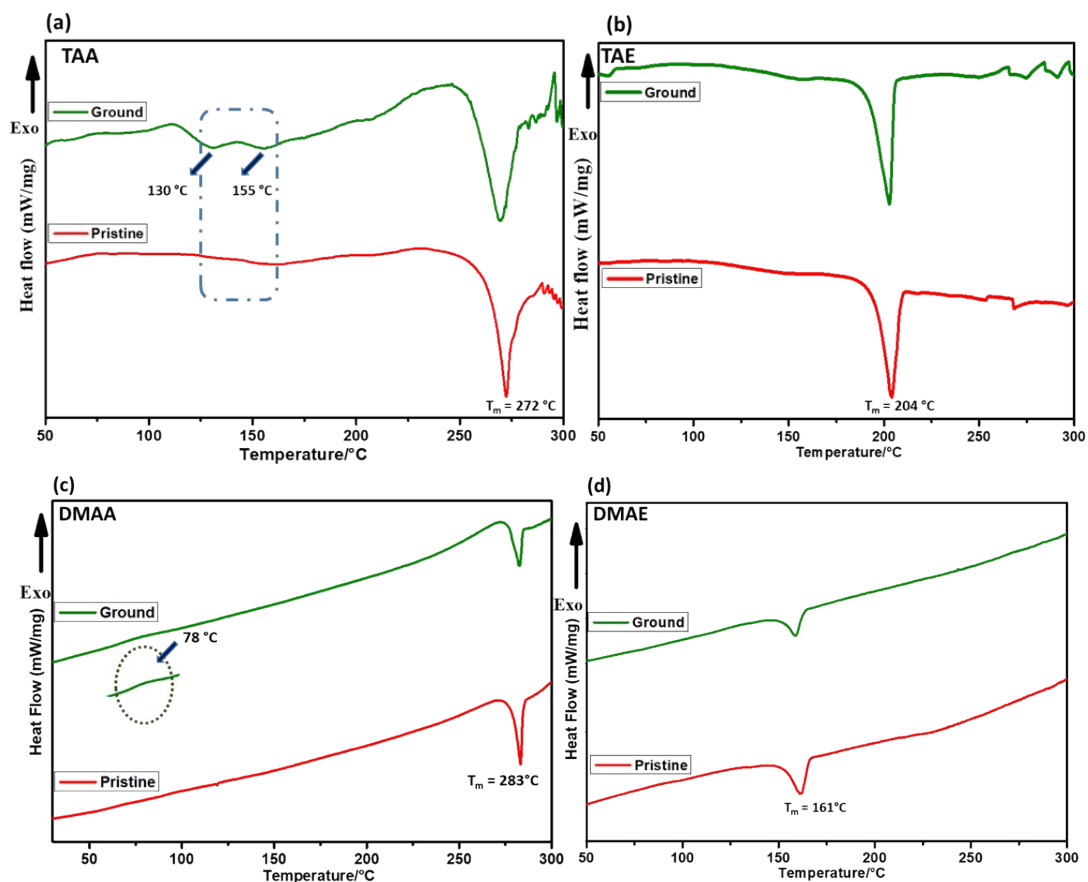

**Figure S11:** DSC analysis of (a) TAA (b) TAE (c) DMAA (d) DMA

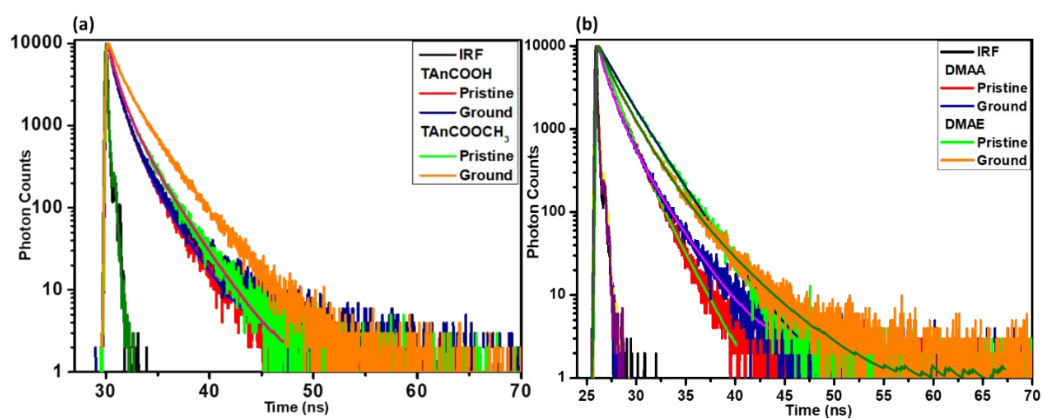

**Figure S12:** Lifetime plot for (a) TAA; TAE (b) DMAA; DMAE

| Compounds | States   | $\alpha_1$ | $\alpha_2$ | $\alpha_3$ | $\tau_1$ | $\tau_2$ | $\tau_3$ | $\langle\tau\rangle$ | $\chi^2$ |
|-----------|----------|------------|------------|------------|----------|----------|----------|----------------------|----------|
| TAA       | Pristine | 0.37       | 0.56       | 0.06       | 0.88     | 0.27     | 2.26     | 0.63                 | 1.02     |
|           | Ground   | 0.34       | 0.62       | 0.03       | 1.04     | 0.30     | 2.74     | 0.64                 | 1.06     |

|             |          |      |      |      |      |      |      |      |      |
|-------------|----------|------|------|------|------|------|------|------|------|
| <b>TAE</b>  | Pristine | 0.32 | 0.11 | 0.57 | 0.96 | 2.31 | 0.28 | 0.73 | 1.16 |
|             | Ground   | 0.38 | 0.40 | 0.21 | 1.29 | 0.35 | 2.74 | 0.77 | 1.04 |
| <b>DMAA</b> | Pristine | 0.25 | 0.63 | 0.12 | 0.26 | 1.2  | 2.12 | 1.07 | 1.05 |
|             | Ground   | 0.36 | 0.09 | 0.54 | 1.06 | 2.48 | 0.22 | 0.75 | 1.04 |
| <b>DMAE</b> | Pristine | 0.28 | 0.39 | 0.31 | 1.55 | 2.52 | 0.23 | 1.52 | 1.06 |
|             | Ground   | 0.37 | 0.57 | 0.05 | 0.44 | 1.82 | 3.99 | 1.43 | 1.01 |

**Table S4:** Lifetime Parameters ( $\tau$ ; ns) measurement of excited state.  $\lambda_{\text{ex}} = 405$  nm

**Table S5:** Solid state photophysical parameters for all the compounds with absorption and emission wavelength

| Samples     | States   | $\lambda_{\text{abs}}^{\text{max}}$ (nm) | $\lambda_{\text{em}}^{\text{max}}$ (nm) | $\Phi_f$ (%) | $\langle \tau \rangle$ | $k_r/k_{nr}$ (in $\text{s}^{-1}$ ) |
|-------------|----------|------------------------------------------|-----------------------------------------|--------------|------------------------|------------------------------------|
| <b>TAA</b>  | Pristine | 415                                      | 512                                     | 3.7          | 0.62                   | 0.06/1.55                          |
|             | Ground   | 442                                      | 535                                     | 5            | 0.64                   | 0.08/1.48                          |
| <b>TAE</b>  | Pristine | 419                                      | 491                                     | 2.7          | 0.73                   | 0.04/1.33                          |
|             | Ground   | 420                                      | 492                                     | 10           | 0.77                   | 0.13/1.17                          |
| <b>DMAA</b> | Pristine | 429                                      | 494                                     | 10.33        | 1.07                   | 0.096/0.838                        |
|             | Ground   | 437                                      | 520                                     | 31.33        | 0.75                   | 0.418/0.916                        |
| <b>DMAE</b> | Pristine | 434                                      | 483                                     | 24.91        | 1.52                   | 0.164/0.494                        |
|             | Ground   | 440                                      | 512                                     | 42.64        | 1.43                   | 0.298/0.401                        |

**Table S6:** Quantitative interactions (%) of all the compounds

| Type of Interactions | TAE  | TAA  | DMAE | DMAA |
|----------------------|------|------|------|------|
| <b>C...H</b>         | 19.4 | 15.8 | 16.6 | 15.7 |
| <b>H...C</b>         | 15.6 | 13.7 | 13.4 | 12.9 |

|              |      |      |      |      |
|--------------|------|------|------|------|
| <b>H...H</b> | 43.6 | 50.7 | 52.4 | 49.5 |
| <b>C...C</b> | 4.4  | 5.4  | 1.1  | 4.7  |
| <b>C...O</b> | 0.4  | 1    | 0.8  | 0.5  |
| <b>C...S</b> | 0.2  | 0    | -    | -    |
| <b>O...H</b> | 5    | 6.5  | 7.9  | 8.1  |
| <b>O...C</b> | 0.3  | 0.5  | 3.9  | 0.7  |
| <b>O...O</b> | -    | -    | 0.2  | 1    |
| <b>S...S</b> | 0.6  | 0    | -    | -    |
| <b>S...H</b> | 3.9  | 0.7  | -    | -    |
| <b>S...C</b> | 0.2  | 0    | -    | -    |
| <b>H...S</b> | 2.5  | 0.7  | -    | -    |
| <b>H...O</b> | 4    | 4.9  | 6.9  | 7.2  |

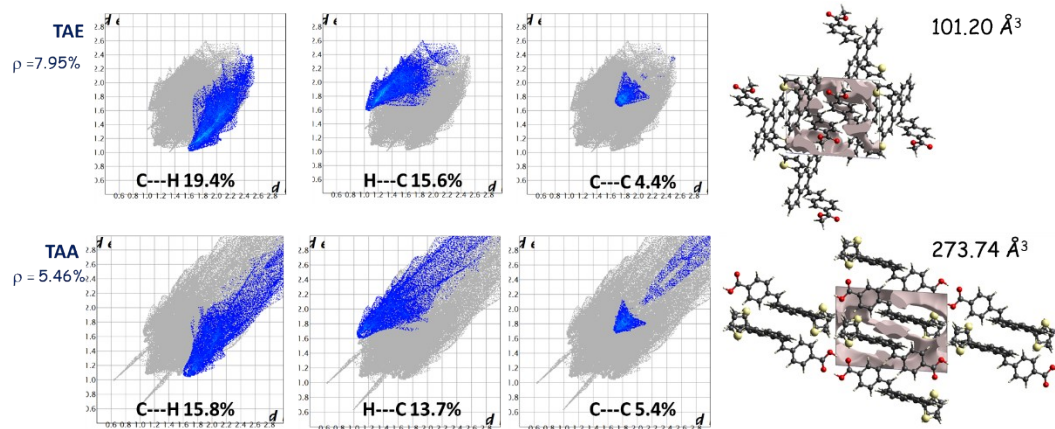

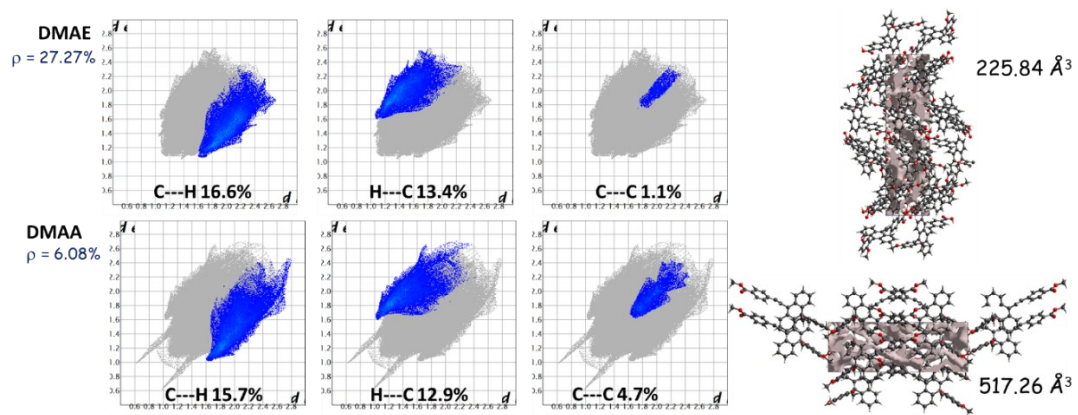

**Figure S13:**  $d_{\text{norm}}$  Hirshfeld surfaces for TAA, TAE, DMAE and DMAA and their 2D finger plots of C...H, H...C and C...C interactions

**Table S7:** Crystallographic parameters of all the compounds

| Compounds                                               | TAE                                              | TAA                                              | DMAE                                           | DMAA                                           |
|---------------------------------------------------------|--------------------------------------------------|--------------------------------------------------|------------------------------------------------|------------------------------------------------|
| Emp. Formula                                            | C <sub>28</sub> H <sub>20</sub> O <sub>2</sub> S | C <sub>27</sub> H <sub>18</sub> O <sub>2</sub> S | C <sub>32</sub> H <sub>26</sub> O <sub>4</sub> | C <sub>31</sub> H <sub>24</sub> O <sub>4</sub> |
| Formula Weight                                          | 420.50                                           | 406.47                                           | 474.525                                        | 459.49                                         |
| Crystal System                                          | Triclinic                                        | Triclinic                                        | Monoclinic                                     | Monoclinic                                     |
| Space Group                                             | P-1                                              | P-1                                              | P-2 <sub>1</sub>                               | P-2 <sub>1</sub> /c                            |
| a /Å                                                    | 8.9516                                           | 9.2745                                           | 12.0602                                        | 15.2306                                        |
| b /Å                                                    | 10.6649                                          | 9.8947                                           | 8.4487                                         | 33.5647                                        |
| c /Å                                                    | 12.0474                                          | 13.5650                                          | 23.7592                                        | 9.16660                                        |
| α/degree                                                | 81.820                                           | 86.663                                           | 90                                             | 90                                             |
| β/degree                                                | 77.034                                           | 81.113                                           | 92.455                                         | 93.3160                                        |
| γ/degree                                                | 67.133                                           | 72.576                                           | 90                                             | 90                                             |
| V /Å <sup>3</sup>                                       | 1030.78(8)                                       | 1170.74 (4)                                      | 2418.67(14)                                    | 4678.22(11)                                    |
| Z                                                       | 4                                                | 2                                                | 2                                              | 8                                              |
| ρ <sub>calc.</sub> /g cm <sup>-3</sup>                  | 2.710                                            | 1.153                                            | 1.303                                          | 1.305                                          |
| μ /mm <sup>-1</sup>                                     | 3.146                                            | 1.370                                            | 0.680                                          | 0.687                                          |
| F (000)                                                 | 880.0                                            | 424                                              | 1000                                           | 1928                                           |
| Data/ restraints/<br>parameters                         | 4331/0/281                                       | 4914/1/282                                       | 6832/1/655                                     | 9936/0/636                                     |
| S                                                       | 1.080                                            | 1.093                                            | 1.069                                          | 1.036                                          |
| R1 [ >2σ(I)]                                            | 0.0543                                           | 0.0402                                           | 0.1054                                         | 0.059                                          |
| wR2 [all data]                                          | 0.1648                                           | 0.1249                                           | 0.2986                                         | 0.1646                                         |
| Max/min. residual<br>electron dens. [eÅ <sup>-3</sup> ] | 0.34/-0.64                                       | 0.25/-0.30                                       | 1.16/-0.46                                     | 0.68/-0.39                                     |

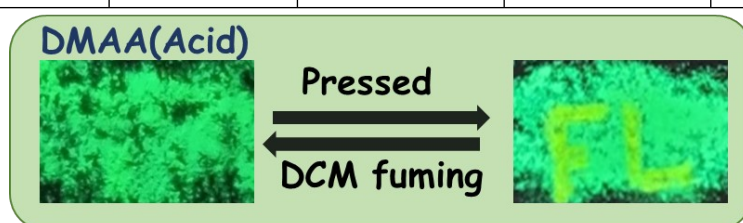**Figure S14:** Application of DMAA as a rewritable optical recorder

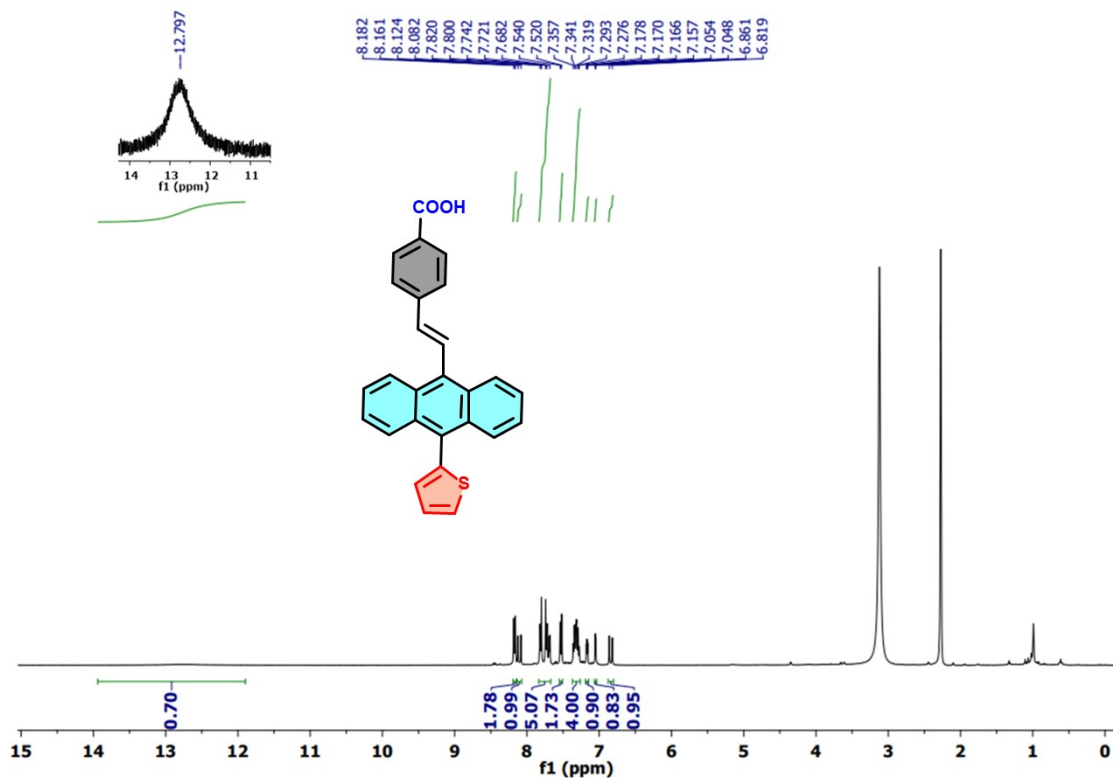

**Figure S15:** <sup>1</sup>H-NMR spectrum of TAA in DMSO-d<sub>6</sub>

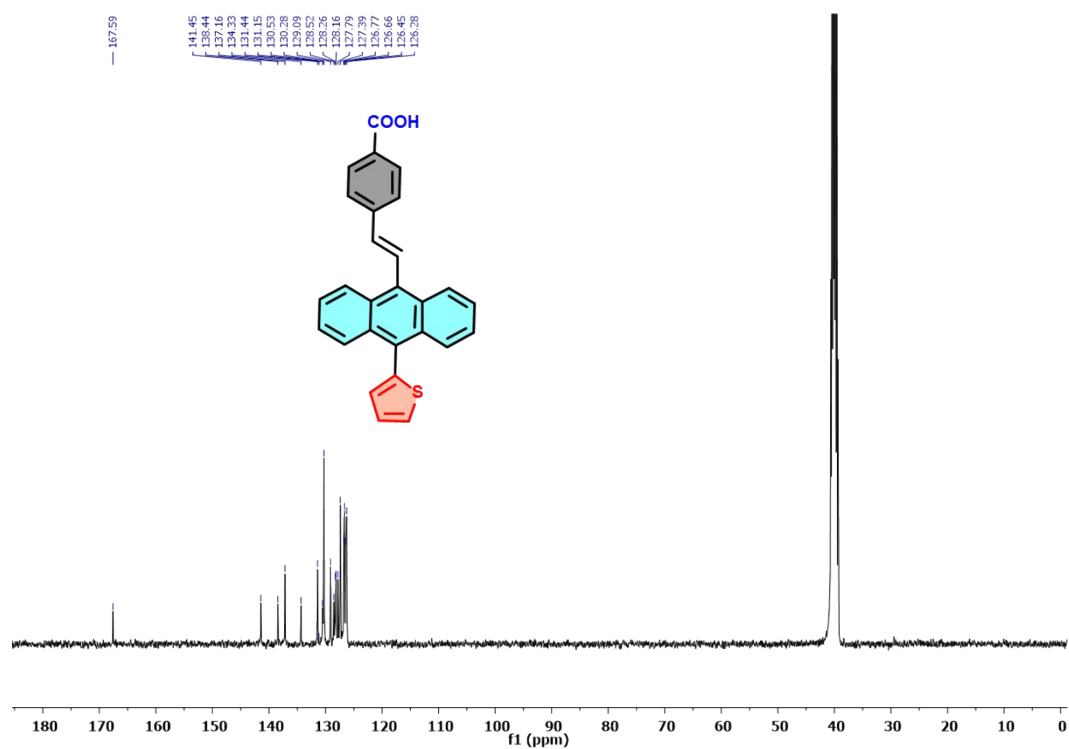

**Figure S16:** <sup>13</sup>C-NMR spectrum of TAA in DMSO-d<sub>6</sub>

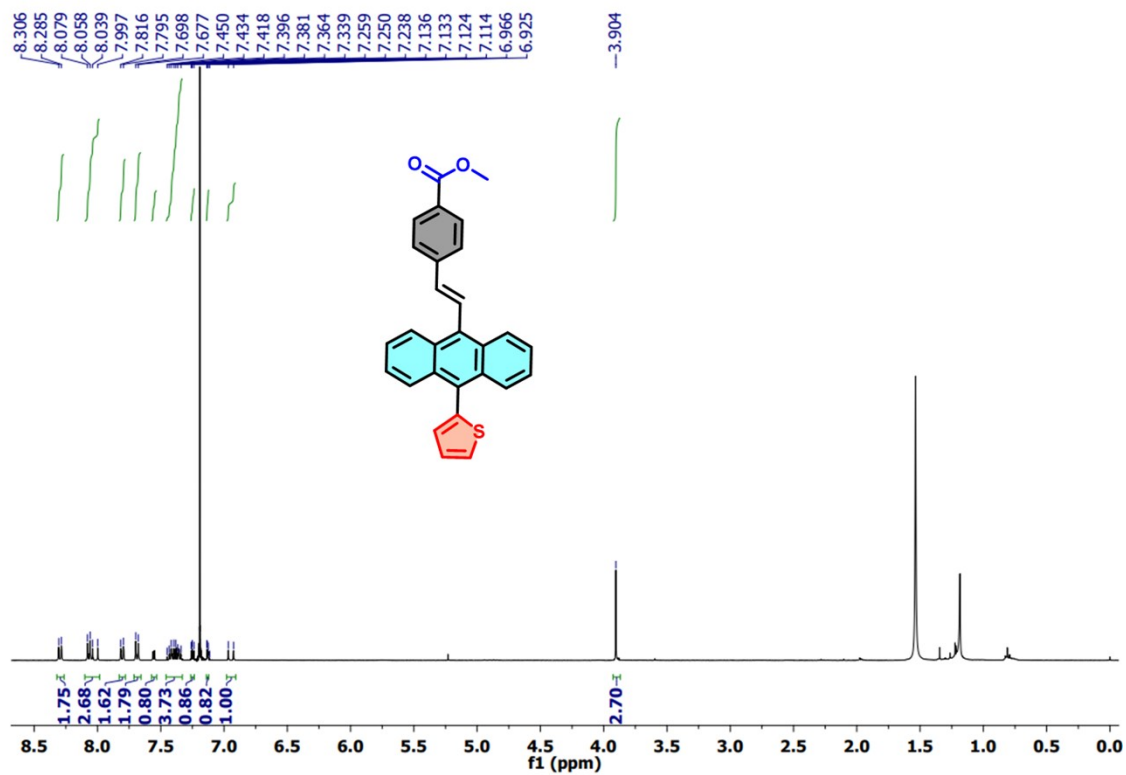

Figure S17:  $^1\text{H-NMR}$  spectrum of TAE in  $\text{CDCl}_3$

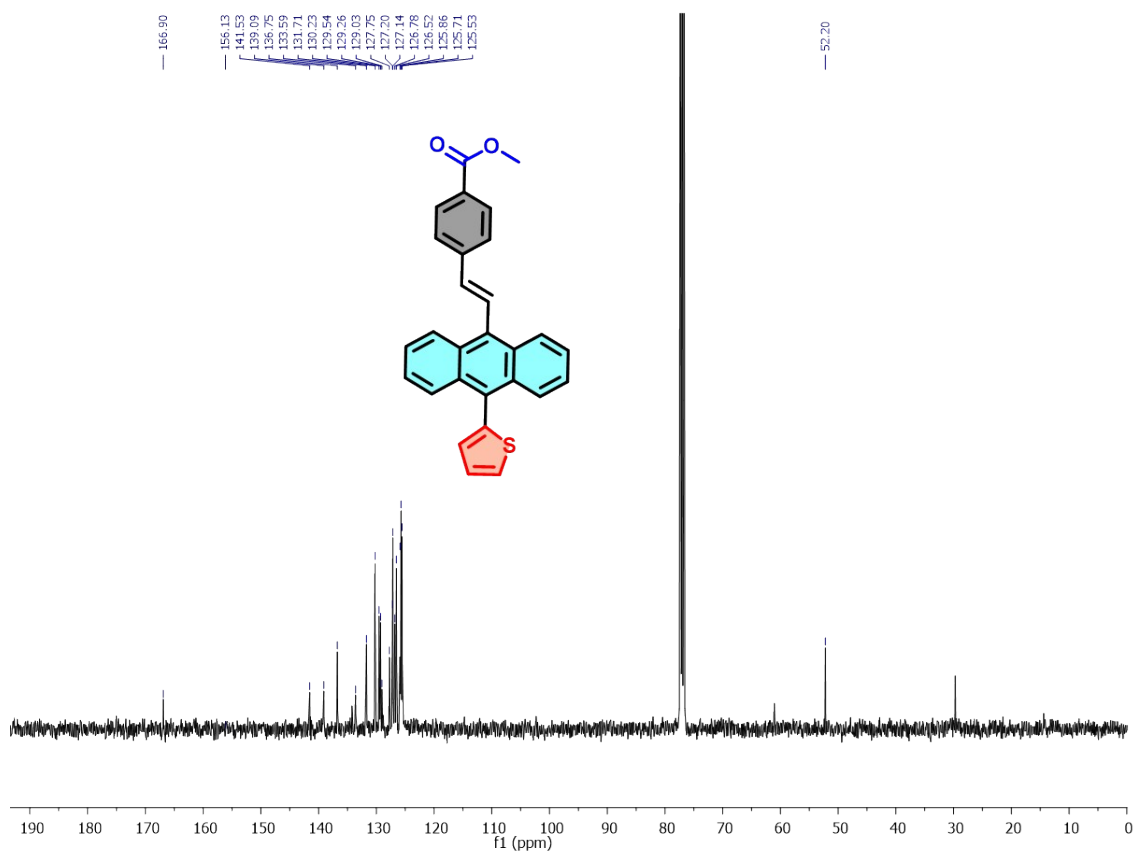

Figure S18:  $^{13}\text{C-NMR}$  spectrum of TAE in  $\text{CDCl}_3$

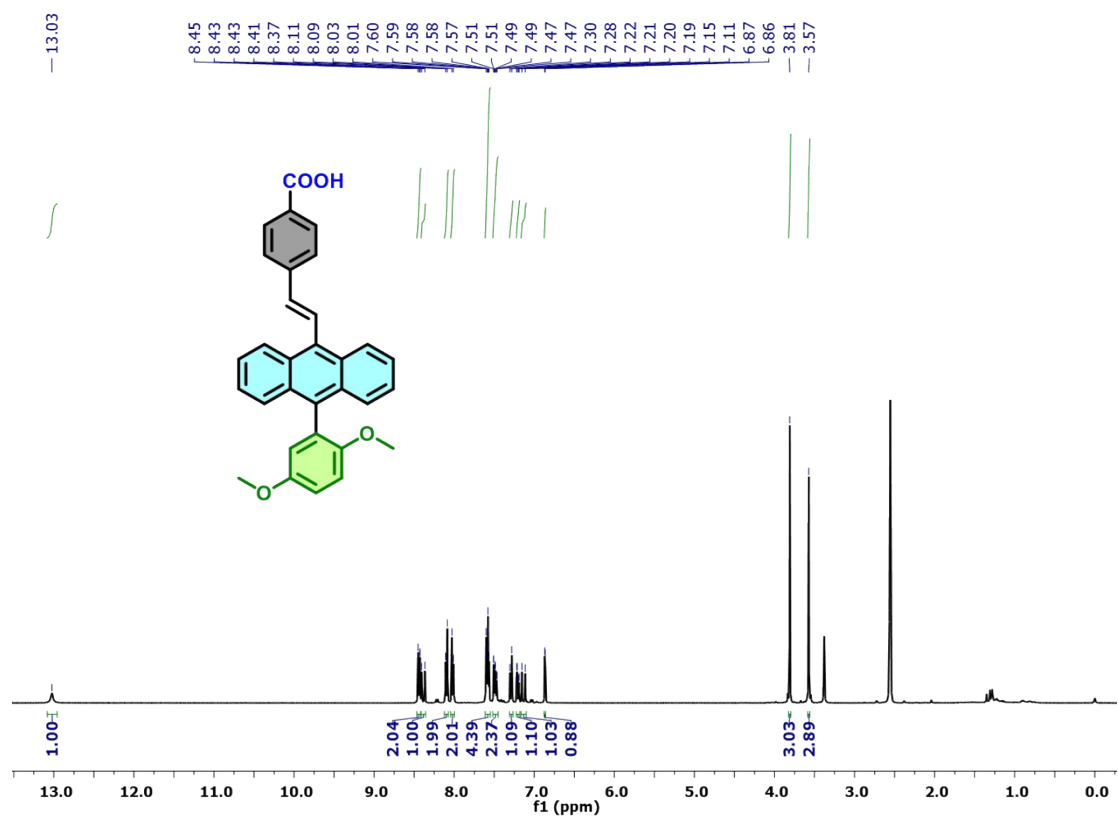

Figure S19:  $^1\text{H-NMR}$  spectrum of DMAA in  $\text{DMSO-d}_6$

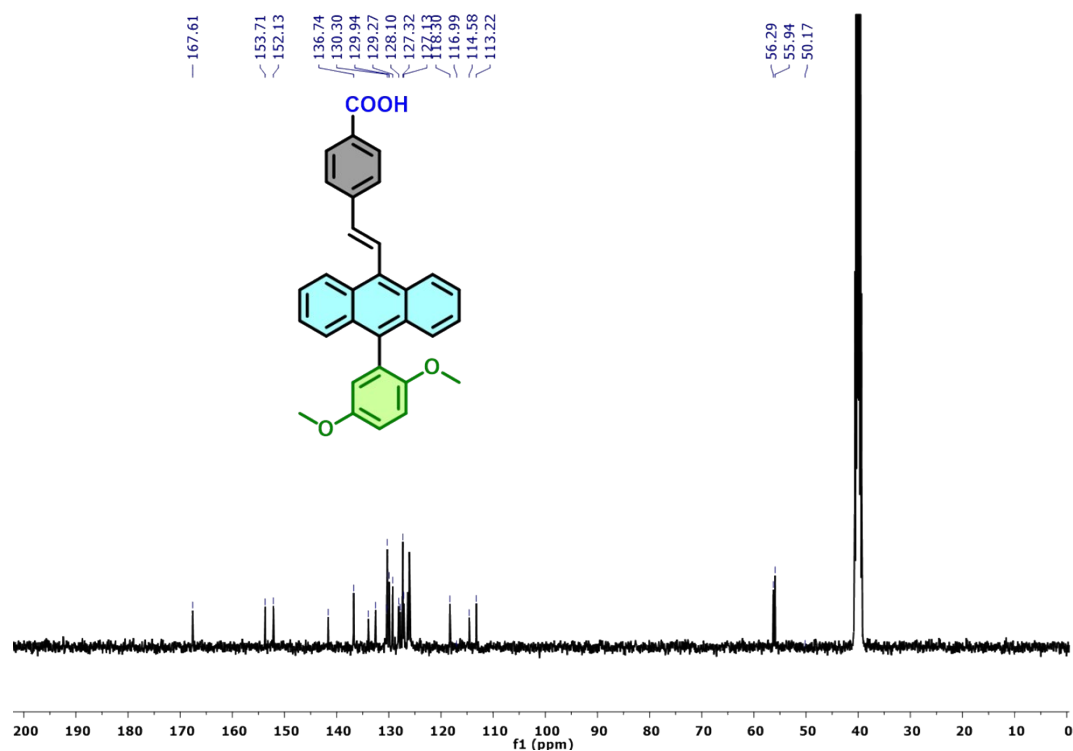

Figure S20:  $^{13}\text{C-NMR}$  spectrum of DMAA in  $\text{DMSO-d}_6$



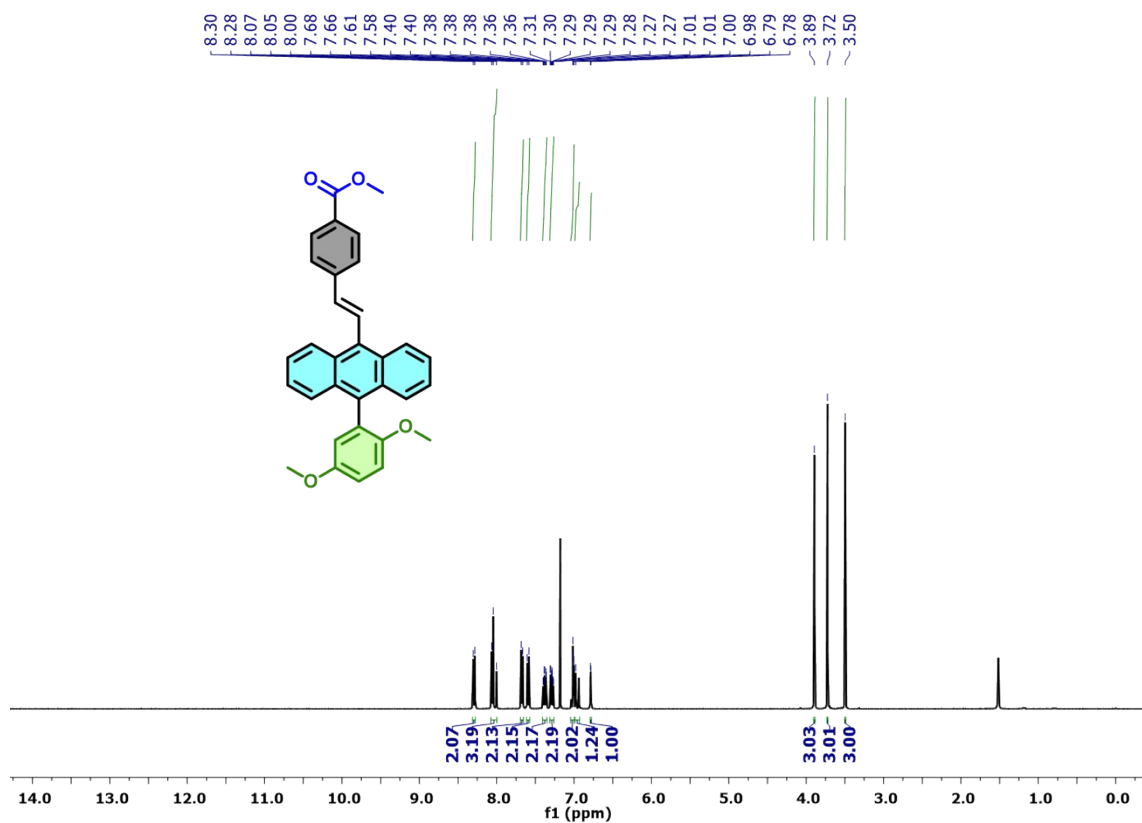

Figure S21: <sup>1</sup>H NMR spectrum for DMAE in CDCl<sub>3</sub>

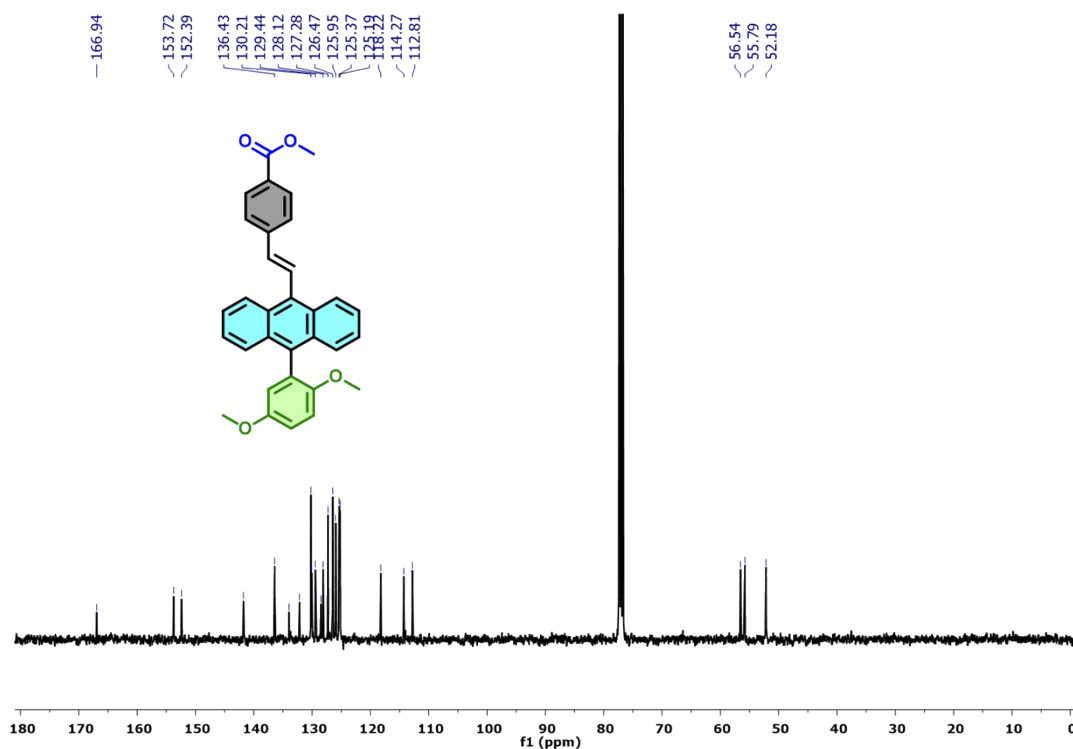

Figure S22: <sup>13</sup>C NMR spectrum for DMAE in CDCl<sub>3</sub>

END
